# Supplementary material
Source: PubMed Central journal article supplement (PMC8480388)
Supplement: mmc1.pdf [file mmc1.pdf]

**Supplemental information**

**The interferon landscape along the respiratory tract impacts the severity of COVID-19**

**Benedetta Sposito, Achille Broggi, Laura Pandolfi, Stefania Crotta, Nicola Clementi, Roberto Ferrarese, Sofia Sisti, Elena Criscuolo, Roberto Spreafico, Jaclyn M. Long, Alessandro Ambrosi, Enju Liu, Vanessa Frangipane, Laura Saracino, Sara Bozzini, Laura Marongiu, Fabio A. Facchini, Andrea Bottazzi, Tommaso Fossali, Riccardo Colombo, Massimo Clementi, Elena Tagliabue, Janet Chou, Antonio E. Pontiroli, Federica Meloni, Andreas Wack, Nicasio Mancini, and Ivan Zanoni**

|                    |                    | Swab NEG | Swab POS total | Swab POS + | Swab POS ++ | Swab POS +++ |
|--------------------|--------------------|----------|----------------|------------|-------------|--------------|
|                    | <b>Samples (#)</b> | 28(183)  | 155(183)       | 51(155)    | 46(155)     | 58(155)      |
| <b>Age</b>         | <b>Minimum</b>     | 23       | 10             | 17         | 10          | 26           |
|                    | <b>Maximum</b>     | 86       | 98             | 93         | 98          | 97           |
|                    | <b>Q1</b>          | 46       | 44             | 46         | 46          | 48           |
|                    | <b>Q3</b>          | 72       | 80             | 83         | 80          | 79           |
|                    | <b>IQR</b>         | 26       | 36             | 37         | 34          | 31           |
|                    | <b>Median</b>      | 56       | 58             | 68         | 55          | 61           |
|                    | <b>Mean</b>        | 57       | 60             | 62         | 58          | 62           |
|                    | <b>≥ 70 (#)</b>    | 8(28)    | 61(155)        | 25(51)     | 16(46)      | 20(58)       |
|                    | <b>&lt; 70 (#)</b> | 20(28)   | 94(155)        | 26(51)     | 30(46)      | 38(58)       |
|                    | <b>≥ 70 (%)</b>    | 29       | 39             | 49         | 35          | 34           |
| <b>&lt; 70 (%)</b> | 71                 | 61       | 51             | 65         | 66          |              |
| <b>Sex</b>         | <b>F (#)</b>       | 15(28)   | 85(155)        | 27(51)     | 27(46)      | 31(58)       |
|                    | <b>M (#)</b>       | 13(28)   | 70(155)        | 24(51)     | 19(46)      | 27(58)       |
|                    | <b>F (%)</b>       | 54       | 55             | 53         | 59          | 53           |
|                    | <b>M (%)</b>       | 46       | 45             | 47         | 41          | 47           |

**SUPPLEMENTAL TABLE 1. Patient information for Swab NEG and Swab POS samples used for gene expression. Related to FIGURE and SUPPLEMENTAL FIGURE 1.** Age, sex and severity characteristics of patient cohorts analyzed in **Figure 1 and Supplemental Figure 1**. Nasopharyngeal swabs from SARS-CoV-2-negative (Swab NEG) and -positive (Swab POS total) subjects, that were further divided in viral load terciles (“Swab POS +”, “Swab POS++”, “Swab POS+++”), were analyzed by qPCR. Q1=quartile 1, Q3=quartile 3, IQR=interquartile range, ≥ 70=over or equal to 70 years old, <70=under 70 years old, F=female, M=male, #=number of samples, %=percentage of samples.

| Outcome/gene   | Viral load tercile | Age <70         |         | Age ≥70          |         | P value for interaction |
|----------------|--------------------|-----------------|---------|------------------|---------|-------------------------|
|                |                    | Odds ratio      | P value | Odds ratio       | P value |                         |
| <i>IFNA2</i>   | +                  | Reference(1.0)  |         | Reference(1.0)   |         | 0.38                    |
|                | ++                 | 0.7(0.3,2.2)    | 0.59    | 0.5(0.1,2.1)     | 0.36    |                         |
|                | +++                | 3.2(1.1,9.2)    | 0.03    | 0.9(0.2,3.6)     | 0.89    |                         |
| <i>IFNA4</i>   | +                  | Reference(1.0)  |         | Reference(1.0)   |         | 0.03                    |
|                | ++                 | 1.1(0.2,5.5)    | 0.92    | 0.5(0.1,2.4)     | 0.38    |                         |
|                | +++                | 10.7(2.4,47.9)  | 0.002   | 0.8(0.2,3.0)     | 0.70    |                         |
| <i>IFNB1</i>   | +                  | Reference(1.0)  |         | Reference(1.0)   |         | 0.14                    |
|                | ++                 | 0.5(0.1,1.5)    | 0.19    | 0.5(0.1,1.8)     | 0.29    |                         |
|                | +++                | 8.8(2.6,30.2)   | <0.001  | 1.7(0.4,6.8)     | 0.49    |                         |
| <i>IFNL1</i>   | +                  | NE              |         | NE               |         | 0.06                    |
|                | ++                 | Reference(1.0)  |         | Reference(1.0)   |         |                         |
|                | +++                | 48.0(5.8,399.0) | <0.001  | 2.1(0.5,8.9)     | 0.33    |                         |
| <i>IFNL2,3</i> | +                  | Reference(1.0)  |         | Reference(1.0)   |         | <0.001                  |
|                | ++                 | 1.0(0.3,3.9)    | 0.96    | 0.8(0.2,3.0)     | 0.80    |                         |
|                | +++                | 22.1(6.0,82.0)  | <0.001  | 1.0(0.3,3.5)     | 0.95    |                         |
| <i>IFNL4</i>   | +                  | Reference(1.0)  |         | Reference(1.0)   |         | 0.13                    |
|                | ++                 | NE              |         | 0.6(0.1,3.2)     | 0.47    |                         |
|                | +++                | 4.2(1.0,17.6)   | 0.049   | 0.6(0.2,2.1)     | 0.39    |                         |
| <i>IL1B</i>    | +                  | Reference(1.0)  |         | Reference(1.0)   |         | 0.13                    |
|                | ++                 | 5.3(1.6,17.6)   | 0.005   | 0.8(0.2,3.6)     | 0.73    |                         |
|                | +++                | 11.5(3.1,42.6)  | <0.001  | NE               |         |                         |
| <i>IL6</i>     | +                  | Reference(1.0)  |         | Reference(1.0)   |         | 0.80                    |
|                | ++                 | 2.7(0.3,27.8)   | 0.40    | 7.8(0.8,79.3)    | 0.08    |                         |
|                | +++                | 28.1(3.4,233.1) | 0.002   | 83.90(8.2,857.3) | <0.001  |                         |

**SUPPLEMENTAL TABLE 2. Odds ratio of expressing/not each gene across viral load terciles and age groups in swabs from SARS-CoV-2 positive patients. Related to FIGURE SUPPLEMENTAL 1.** Odds ratio of expressing *IFNL1* in “+++” with respect to “++” and *IFNL2,3*, *IFNL4*, *IFNB1*, *IFNA2*, *IFNA4*, *IL1B*, and *IL6* mRNA in “+++” and “++” with respect to “+” swabs from SARS-CoV-2 positive ≥ 70 and < 70 patients was calculated. Odds ratio column indicates the odds ratio and associated 95% confidence interval in brackets. P value column indicates the associated P value for each cohort of patients. Interaction between viral load terciles and age groups (≥70 years vs <70 years) was tested and P values for interaction are indicated. NE=not estimable.

|            |                    | Gene Expression |        |       | Mean Viral RNA CT progression |       |       |
|------------|--------------------|-----------------|--------|-------|-------------------------------|-------|-------|
|            |                    | HI              | HOSP   | ICU   | HI                            | HOSP  | ICU   |
|            | <b>Samples (#)</b> | 9(31)           | 19(31) | 3(31) | 6(12)                         | 5(12) | 1(12) |
| <b>Age</b> | <b>Minimum</b>     | 22              | 38     | 60    | 50                            | 32    | NA    |
|            | <b>Maximum</b>     | 78              | 97     | 69    | 84                            | 84    | NA    |
|            | <b>Q1</b>          | 42              | 57     | 64    | 54                            | 51    | NA    |
|            | <b>Q3</b>          | 51              | 85     | 69    | 73                            | 81    | NA    |
|            | <b>IQR</b>         | 9               | 29     | 5     | 19                            | 30    | NA    |
|            | <b>Median</b>      | 47              | 76     | 68    | 68                            | 73    | 91    |
|            | <b>Mean</b>        | 50              | 71     | 66    | 66                            | 64    | 91    |
| <b>Sex</b> | <b>F (#)</b>       | 4(9)            | 9(19)  | 1(3)  | 3(6)                          | 2(5)  | 1(1)  |
|            | <b>M (#)</b>       | 5(9)            | 10(19) | 2(3)  | 3(6)                          | 3(5)  | 0(1)  |
|            | <b>F (%)</b>       | 44              | 47     | 33    | 50                            | 40    | 100   |
|            | <b>M (%)</b>       | 56              | 53     | 67    | 50                            | 60    | 0     |

**SUPPLEMENTAL TABLE 3. Patient information for HI, HOSP and ICU Swab samples for gene expression and for Mean Viral RNA CT progression analysis. Related to FIGURE 2 and SUPPLEMENTAL FIGURE 2.** Age, sex and severity characteristics of patient cohorts analyzed in **Figure 2 and Supplemental Figure 2.** Nasopharyngeal swabs from SARS-CoV-2 positive subjects that were either home-isolated (HI), hospitalized (HOSP)) or hospitalized and admitted to the ICU (ICU) were analyzed by qPCR for gene expression or were analyzed longitudinally for mean viral RNA CT. Q1=quartile 1, Q3=quartile 3, IQR=interquartile range, F=female, M=male, #=number of samples, %=percentage of samples.

|                           |                    | Swab NEG | Swab POS |
|---------------------------|--------------------|----------|----------|
|                           | <b>Samples (#)</b> | 3(18)    | 15(18)   |
| <b>Viral load tercile</b> | <b>+ (#)</b>       | NA       | 3(15)    |
|                           | <b>++ (#)</b>      | NA       | 6(15)    |
|                           | <b>+++ (#)</b>     | NA       | 6(15)    |
| <b>Severity</b>           | <b>HI (#)</b>      | NA       | 5(15)    |
|                           | <b>HOSP (#)</b>    | NA       | 7(15)    |
|                           | <b>ICU (#)</b>     | NA       | 3(15)    |
| <b>Age</b>                | <b>Minimum</b>     | 29       | 42       |
|                           | <b>Maximum</b>     | 86       | 96       |
|                           | <b>Q1</b>          | 51       | 51       |
|                           | <b>Q3</b>          | 80       | 77       |
|                           | <b>IQR</b>         | 29       | 27       |
|                           | <b>Median</b>      | 73       | 68       |
|                           | <b>Mean</b>        | 63       | 65       |
| <b>Sex</b>                | <b>F (#)</b>       | 1(3)     | 6(15)    |
|                           | <b>M (#)</b>       | 2(3)     | 9(15)    |
|                           | <b>F (%)</b>       | 33       | 40       |
|                           | <b>M (%)</b>       | 67       | 60       |

**SUPPLEMENTAL TABLE 4. Patient information for swab samples used for RNA-Seq. Related to FIGURE and SUPPLEMENTAL FIGURE 3.** Age and sex characteristics of patient cohorts analyzed in **Figure 3 and Supplemental Figure 3**. Nasopharyngeal swabs from SARS-CoV-2 positive patients divided in viral load terciles (“+++”, “++”, “+”) and that were either home-isolated (HI), hospitalized (HOSP)) or hospitalized and admitted to the ICU (ICU) were analyzed by RNA-Seq. Q1=quartile 1, Q3=quartile 3, IQR=interquartile range, ≥ 70=over or equal to 70 years old, <70=under 70 years old, F=female, M=male, #=number of samples, %=percentage of samples.

|           |                 | BALF NEG CTRL | BALF POS | Swab POS |
|-----------|-----------------|---------------|----------|----------|
|           | Samples (#)     | 24(72)        | 26(72)   | 22(72)   |
| Severity  | HOSP (#)        | NA            | 5(26)    | 19(22)   |
|           | ICU (#)         | NA            | 21(26)   | 3(22)    |
|           |                 |               |          |          |
| Diagnosis | Fibrosis (#)    | 8(24)         | NA       | NA       |
|           | Sarcoidosis (#) | 8(24)         | NA       | NA       |
|           | Transplant (#)  | 8(24)         | NA       | NA       |
| Age       | Minimum         | 33            | 47       | 38       |
|           | Maximum         | 100           | 86       | 97       |
|           | Q1              | 50            | 61       | 58       |
|           | Q3              | 64            | 71       | 84       |
|           | IQR             | 14            | 10       | 27       |
|           | Median          | 57            | 66       | 69.5     |
|           | Mean            | 59            | 65       | 70       |
| Sex       | F (#)           | 12(24)        | 4(26)    | 12(22)   |
|           | M (#)           | 12(24)        | 22(26)   | 10(22)   |
|           | F (%)           | 50            | 15       | 55       |
|           | M (%)           | 50            | 85       | 45       |

**SUPPLEMENTAL TABLE 5. Patient information for swab and BALF samples used for gene expression.**

**Related to FIGURE and SUPPLEMENTAL FIGURE 4.** Age and sex characteristics of patient cohorts analyzed in **Figure 4 and Supplemental Figure 4**. Nasopharyngeal swabs and BALF from SARS-CoV-2 positive patients that were either home-isolated (HI), hospitalized (HOSP)) or hospitalized and admitted to the ICU (ICU) and BALF from SARS-CoV-2 negative patients were analyzed by qPCR. Q1=quartile 1, Q3=quartile 3, IQR=interquartile range, , F=female, M=male, #=number of samples, %=percentage of samples.

|                    |                 | BALF NEG CTRL | BALF POS | Swab POS |
|--------------------|-----------------|---------------|----------|----------|
| Viral load tercile | Samples (#)     | 5(27)         | 7(27)    | 15(27)   |
|                    | +               | NA            | NA       | 3(15)    |
|                    | ++              | NA            | NA       | 6(15)    |
|                    | +++             | NA            | NA       | 6(15)    |
| Diagnosis          | Fibrosis (#)    | 1(5)          | NA       | NA       |
|                    | Sarcoidosis (#) | 2(5)          | NA       | NA       |
|                    | Transplant (#)  | 2(5)          | NA       | NA       |
| Severity           | HI (#)          | NA            | 0(7)     | 5(15)    |
|                    | HOSP (#)        | NA            | 0(7)     | 7(15)    |
|                    | ICU (#)         | NA            | 7(7)     | 3(15)    |
| Age                | Minimum         | 45            | 48       | 42       |
|                    | Maximum         | 64            | 72       | 96       |
|                    | Q1              | 53            | 66       | 51       |
|                    | Q3              | 63            | 71       | 77       |
|                    | IQR             | 10            | 5        | 27       |
|                    | Median          | 63            | 69       | 68       |
|                    | Mean            | 58            | 66       | 65       |
| Sex                | F (#)           | 2(5)          | 3(7)     | 6(15)    |
|                    | M (#)           | 3(5)          | 4(7)     | 9(15)    |
|                    | F (%)           | 40            | 43       | 40       |
|                    | M (%)           | 60            | 57       | 60       |

**SUPPLEMENTAL TABLE 6. Patient information for swab and BALF samples used for RNA-Seq. Related to FIGURE and SUPPLEMENTAL FIGURE 5.** Age and sex characteristics of patient cohorts analyzed in Figure 5 and Supplemental Figure 5. Nasopharyngeal swabs and BALF from SARS-CoV-2 positive patients that were either home-isolated (HI), hospitalized (HOSP)) or hospitalized and admitted to the ICU (ICU) and BALF from SARS-CoV-2 negative patients were analyzed by RNA-Seq. Q1=quartile 1, Q3=quartile 3, IQR=interquartile range, F=female, M=male, #=number of samples, %=percentage of samples.

|        |             | COVID-19 | ARDS H1N1+ | ARDS H1N1- | Fibrosis | Sarcoidosis | Transplant |
|--------|-------------|----------|------------|------------|----------|-------------|------------|
| Age    | Samples (#) | 29(68)   | 5(68)      | 4(68)      | 10(68)   | 10(68)      | 10(68)     |
|        | Minimum     | 28       | 42         | 44         | 64       | 35          | 35         |
|        | Maximum     | 79       | 67         | 76         | 83       | 77          | 67         |
|        | Q1          | 56       | 54         | 54         | 66       | 39          | 53         |
|        | Q3          | 66       | 62         | 70         | 74       | 53          | 58         |
|        | IQR         | 10       | 8          | 16         | 8        | 14          | 5          |
|        | Mean        | 60       | 59         | 63         | 70       | 46          | 56         |
| Sample | Mean        | 61       | 57         | 61         | 71       | 50          | 53         |
|        | BALF (#)    | 29(29)   | 5(5)       | 4(4)       | 10(10)   | 10(10)      | 10(10)     |
|        | Plasma (#)  | 17(29)   | 0(5)       | 0(4)       | 0(10)    | 0(10)       | 0(10)      |

**SUPPLEMENTAL TABLE 7. Patient information for BALF and plasma samples used for cytokine quantification. Related to FIGURE and SUPPLEMENTAL FIGURE 6.** Age and type of collected sample of patient cohorts analyzed in **Figure and Supplemental Figure 6**. BALF and plasma from patients with COVID-19 was analyzed. BALF from patients suffering from: non-COVID-19 ARDS (divided in H1N1 Influenza A virus positive or not), fibrosis, sarcoidosis, and that received lung transplant was analyzed. Q1=quartile 1, Q3=quartile 3, IQR=interquartile range.
